# Supplementary material for: Chronic consumption of alcohol increases alveolar bone loss
Source: PubMed Central journal article supplement (PMC7446912; doi:10.1371/journal.pone.0232731), 2020-08-20
Supplement: pone.0232731.s001.pdf [file pone.0232731.s001.pdf]

### ALT

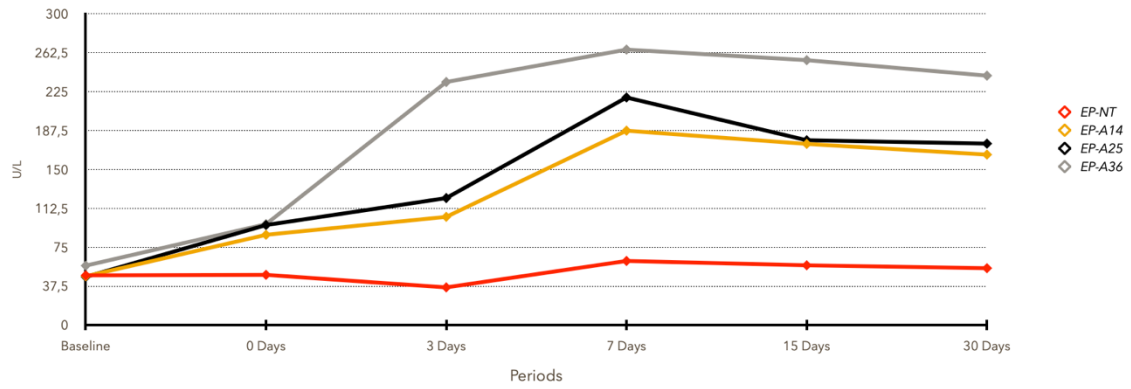

|          | EP-NT | EP-A14 | EP-A25 | EP-A36 |
|----------|-------|--------|--------|--------|
| Baseline | 48    | 47,11  | 46,5   | 57,37  |
| 0        | 48,5  | 87,11  | 96,5   | 97,37  |
| 3 Days   | 36,4  | 104,4  | 122,5  | 234,4  |
| 7 Days   | 61,9  | 187,5  | 219,47 | 265,62 |
| 15 Days  | 57,7  | 174,7  | 178,26 | 255,45 |
| 30 Days  | 54,9  | 164,4  | 174,98 | 240,5  |

### AST

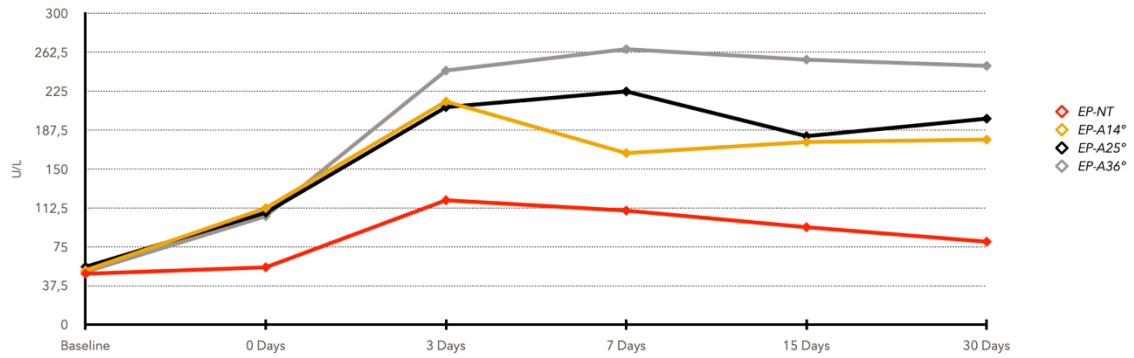

|          | EP-NT | EP-A14 | EP-A25 | EP-A36 |
|----------|-------|--------|--------|--------|
| Baseline | 49,1  | 52,4   | 55,8   | 50,9   |
| 0 Days   | 55,3  | 112,4  | 108    | 104,62 |
| 3 Days   | 120   | 215,2  | 209,75 | 245    |
| 7 Days   | 110   | 165,37 | 224,87 | 265,62 |
| 15 Days  | 94    | 176,12 | 181,75 | 255,45 |
| 30 Days  | 80    | 178,4  | 198,6  | 249,5  |
