# Supplementary material for: Chronic consumption of alcohol increases alveolar bone loss
Source: PubMed Central journal article supplement (PMC7446912; doi:10.1371/journal.pone.0232731), 2020-08-20
Supplement: pone.0232731.s002.pdf [file pone.0232731.s002.pdf]

**GROUPS**

| <b>Animals</b> | <b>EP-NT<br/>3 days</b> | <b>EP-NT<br/>7 days</b> | <b>EP-NT<br/>15 days</b> | <b>EP-NT<br/>30 days</b> | <b>EP -A14<br/>3 days</b> | <b>EP -A14<br/>7 days</b> | <b>EP -A14<br/>15 days</b> | <b>EP -A14<br/>30 days</b> | <b>EP -A25<br/>3 days</b> | <b>EP -A25<br/>7 days</b> | <b>EP -A25<br/>15 days</b> | <b>EP -A25<br/>30 days</b> | <b>EP -A36<br/>3 days</b> | <b>EP -A36<br/>7 days</b> | <b>EP -A36<br/>15 days</b> | <b>EP -A36<br/>30 days</b> |
|----------------|-------------------------|-------------------------|--------------------------|--------------------------|---------------------------|---------------------------|----------------------------|----------------------------|---------------------------|---------------------------|----------------------------|----------------------------|---------------------------|---------------------------|----------------------------|----------------------------|
| <b>R1</b>      | 76,99                   | 78,94                   | 85,34                    | 70,08                    | 70,09                     | 64,23                     | 51,34                      | 53,36                      | 75,75                     | 50,39                     | 58,37                      | 58,78                      | 74,68                     | 40,80                     | 17,73                      | 40,85                      |
| <b>R2</b>      | 79,45                   | 71,02                   | 66,18                    | 70,65                    | 86,36                     | 71,40                     | 52,81                      | 45,46                      | 77,26                     | 40,94                     | 44,19                      | 58,00                      | 76,12                     | 52,21                     | 40,24                      | 41,24                      |
| <b>R3</b>      | 79,89                   | 66,08                   | 75,35                    | 83,06                    | 75,82                     | 45,91                     | 38,25                      | 46,54                      | 74,87                     | 65,02                     | 59,47                      | 71,61                      | 77,01                     | 51,35                     | 30,35                      | 30,48                      |
| <b>R4</b>      | 75,45                   | 79,45                   | 77,32                    | 68,61                    | 72,57                     | 42,45                     | 49,93                      | 54,78                      | 72,99                     | 57,70                     | 58,28                      | 42,92                      | 82,02                     | 66,31                     | 32,68                      | 40,98                      |
| <b>R5</b>      | 79,98                   | 77,40                   | 71,09                    | 78,03                    | 70,04                     | 53,11                     | 55,11                      | 39,18                      | 76,97                     | 59,37                     | 46,15                      | 55,21                      | 71,77                     | 44,67                     | 28,24                      | 44,13                      |
| <b>R6</b>      | 75,43                   | 82,43                   | 82,43                    | 68,64                    | 74,14                     | 59,95                     | 55,41                      | 58,27                      | 74,61                     | 57,59                     | 58,44                      | 47,84                      | 83,09                     | 41,82                     | 48,11                      | 30,07                      |
| <b>R7</b>      | 75,20                   | 87,43                   | 68,90                    | 74,38                    | 79,48                     | 64,79                     | 54,98                      | 41,67                      | 69,80                     | 49,39                     | 51,07                      | 37,12                      | 77,98                     | 52,38                     | 44,09                      | 26,40                      |
| <b>R8</b>      | 75,97                   | 74,54                   | 69,79                    | 73,44                    | 86,11                     | 63,47                     | 50,43                      | 59,24                      | 69,86                     | 52,37                     | 40,55                      | 56,43                      | 79,98                     | 49,05                     | 41,13                      | 13,08                      |
| <b>R9</b>      | 78,76                   | 72,45                   | 75,43                    | 80,87                    | 80,90                     | 50,24                     | 42,78                      | 56,53                      | 81,20                     | 58,50                     | 59,66                      | 35,43                      | 85,98                     | 44,05                     | 34,35                      | 35,86                      |
| <b>R10</b>     | 82,68                   | 81,43                   | 68,66                    | 72,78                    | 79,85                     | 58,98                     | 35,21                      | 60,11                      | 84,84                     | 60,35                     | 38,66                      | 45,72                      | 68,09                     | 44,72                     | 31,27                      | 41,95                      |
| <b>MEANS</b>   | 77,98                   | 77,12                   | 74,05                    | 74,05                    | 77,54                     | 57,45                     | 48,62                      | 51,51                      | 75,81                     | 55,16                     | 51,48                      | 50,91                      | 77,67                     | 48,74                     | 34,82                      | 34,50                      |
| <b>SD</b>      | 2,54                    | 6,23                    | 6,29                     | 5,07                     | 5,99                      | 9,24                      | 7,30                       | 7,67                       | 4,67                      | 6,92                      | 8,42                       | 11,15                      | 5,39                      | 7,50                      | 8,85                       | 9,65                       |
