# Supplementary material for: Chronic consumption of alcohol increases alveolar bone loss
Source: PubMed Central journal article supplement (PMC7446912; doi:10.1371/journal.pone.0232731), 2020-08-20
Supplement: pone.0232731.s003.pdf [file pone.0232731.s003.pdf]

**GROUPS**

| <b>Animals</b> | <b>EP-NT<br/>3 days</b> | <b>EP-NT<br/>7 days</b> | <b>EP-NT<br/>15 days</b> | <b>EP-NT<br/>30 days</b> | <b>EP -A14<br/>3 days</b> | <b>EP -A14<br/>7 days</b> | <b>EP -A14<br/>15 days</b> | <b>EP -A14<br/>30 days</b> | <b>EP -A25<br/>3 days</b> | <b>EP -A25<br/>7 days</b> | <b>EP -A25<br/>15 days</b> | <b>EP -A25<br/>30 days</b> | <b>EP -A36<br/>3 days</b> | <b>EP -A36<br/>7 days</b> | <b>EP -A36<br/>15 days</b> | <b>EP -A36<br/>30 days</b> |
|----------------|-------------------------|-------------------------|--------------------------|--------------------------|---------------------------|---------------------------|----------------------------|----------------------------|---------------------------|---------------------------|----------------------------|----------------------------|---------------------------|---------------------------|----------------------------|----------------------------|
| <b>R1</b>      | 17,70                   | 26,00                   | 16,00                    | 10,00                    | 37,00                     | 33,00                     | 35,00                      | 42,00                      | 37,00                     | 33,00                     | 31,00                      | 36,00                      | 57,00                     | 52,00                     | 46,50                      | 55,50                      |
| <b>R2</b>      | 10,40                   | 23,00                   | 12,00                    | 7,70                     | 35,00                     | 28,00                     | 38,00                      | 43,50                      | 29,00                     | 46,00                     | 34,60                      | 32,00                      | 53,00                     | 43,00                     | 51,50                      | 55,50                      |
| <b>R3</b>      | 9,40                    | 19,00                   | 7,00                     | 9,00                     | 28,00                     | 30,00                     | 40,00                      | 39,00                      | 40,00                     | 38,00                     | 33,40                      | 30,00                      | 66,00                     | 48,00                     | 55,50                      | 67,00                      |
| <b>R4</b>      | 10,80                   | 23,00                   | 6,00                     | 6,00                     | 20,00                     | 31,50                     | 30,90                      | 38,00                      | 28,00                     | 34,00                     | 29,50                      | 41,00                      | 56,00                     | 53,00                     | 51,10                      | 59,00                      |
| <b>R5</b>      | 6,40                    | 0,00                    | 10,00                    | 12,00                    | 34,40                     | 35,48                     | 29,00                      | 32,40                      | 24,80                     | 41,00                     | 30,50                      | 36,20                      | 56,20                     | 57,00                     | 65,00                      | 58,00                      |
| <b>R6</b>      | 18,00                   | 24,00                   | 15,00                    | 9,70                     | 32,00                     | 30,48                     | 43,00                      | 43,00                      | 44,00                     | 45,60                     | 35,00                      | 34,00                      | 52,40                     | 55,00                     | 51,00                      | 63,00                      |
| <b>R7</b>      | 9,00                    | 0,00                    | 6,00                     | 7,00                     | 36,00                     | 31,00                     | 45,00                      | 45,50                      | 22,00                     | 35,90                     | 32,60                      | 32,00                      | 55,50                     | 37,00                     | 56,00                      | 56,00                      |
| <b>R8</b>      | 8,70                    | 24,00                   | 9,50                     | 11,50                    | 25,50                     | 31,50                     | 32,40                      | 37,00                      | 34,00                     | 43,00                     | 32,30                      | 28,00                      | 65,00                     | 54,00                     | 48,00                      | 57,00                      |
| <b>R9</b>      | 7,00                    | 21,00                   | 9,50                     | 2,00                     | 21,30                     | 32,60                     | 28,50                      | 37,40                      | 27,50                     | 32,50                     | 26,70                      | 43,50                      | 54,30                     | 51,50                     | 61,00                      | 60,00                      |
| <b>R10</b>     | 12,00                   | 22,00                   | 6,00                     | 14,50                    | 39,60                     | 32,40                     | 24,00                      | 32,00                      | 31,30                     | 35,00                     | 32,40                      | 37,70                      | 61,00                     | 55,50                     | 59,00                      | 59,00                      |
| <b>MEANS</b>   | 10,94                   | 18,20                   | 9,70                     | 8,94                     | 30,88                     | 31,59                     | 34,58                      | 38,98                      | 31,76                     | 38,40                     | 31,80                      | 35,04                      | 57,64                     | 50,60                     | 54,46                      | 59,00                      |
| <b>SD</b>      | 4,00                    | 9,77                    | 3,67                     | 3,50                     | 6,81                      | 1,99                      | 6,82                       | 4,56                       | 6,94                      | 5,15                      | 2,48                       | 4,84                       | 4,77                      | 6,27                      | 5,91                       | 3,64                       |
